# Supplementary material for: Crystal structure analysis of phycocyanin from chromatically adapted Phormidium rubidum A09DM
Source: Royal Society of Chemistry journal article supplement (doi:10.1039/c6ra12493c), 2016-01-01

## Supplementary material

### Crystal structure analysis of phycocyanin from chromatically adapted *Phormidium rubidum* A09DM

Gagan Deep Gupta<sup>1, #</sup>, Ravi R Sonani<sup>2, 3, #</sup>, Mahima Sharma<sup>1</sup>, Krishna Patel<sup>2, 4</sup>, Rajesh P Rastogi<sup>2</sup>, Datta Madamwar<sup>2, \*</sup>, Vinay Kumar<sup>1, \*</sup>

**Running title:** Structural analysis of Phormidium Phycocyanin

<sup>1</sup>Protein crystallography Section, Solid State Physics Division  
Bhabha Atomic Research Centre (BARC),  
Mumbai 400085, India

<sup>2</sup>Post-Graduate Department of Biosciences,  
UGC-Centre of Advanced Study,  
Sardar Patel University, Vadtal Road, Satellite Campus,  
Bakrol, Anand, Gujarat 388 315, India

<sup>3</sup>Present Address:  
Institute of Molecular, Cell and Systems Biology,  
College of Medical, Veterinary and Life Sciences,  
University of Glasgow, Glasgow G12 8TA, UK.

<sup>4</sup>Present address:  
Institute of Bioinformatics and Applied Biotechnology (IBAB),  
Whitefield, Bangalore - 560 066  
Karnataka, India.

# Authors contributed equally to this work.

\*Corresponding authors

Corresponding address:

**E-mail:** [datta\\_madamwar@yahoo.com](mailto:datta_madamwar@yahoo.com) (**D. Madamwar**)  
[vinay@barc.gov.in](mailto:vinay@barc.gov.in) (**V. Kumar**)

**Tel:** +91 22-25593761; fax: +91 22-25505151

## Supplementary material

**Figure S1:** PC production profile of *Phormidium rubidum* A09DM growing under red light.

Culture produced maximum PC at 28 day age.

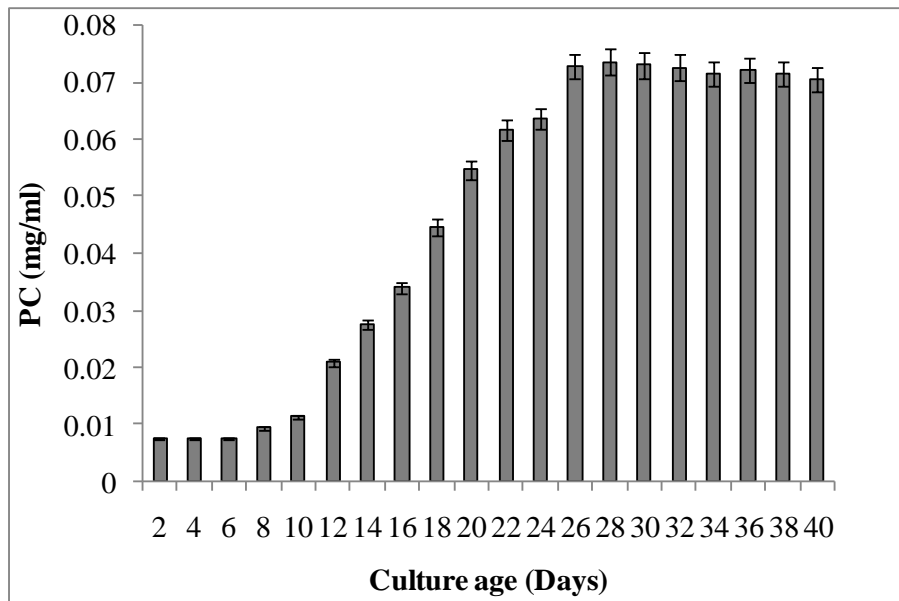

Supplement: c6ra12493c1.pdf [file c6ra12493c1.pdf]
